# Supplementary material for: Good conduct makes your face attractive: The effect of personality perception on facial attractiveness judgments
Source: PubMed Central journal article supplement (PMC9925008; doi:10.1371/journal.pone.0281758), 2023-02-13
Supplement: pone.0281758.s002.pdf [file pone.0281758.s002.pdf]

S1 Table. Results of Experiment 1.

| Rating item                    | Low pre-rated<br>facial attractiveness |                                  | High pre-rated<br>facial attractiveness |                                  | ANOVA <i>p</i> |                                    |                                            |
|--------------------------------|----------------------------------------|----------------------------------|-----------------------------------------|----------------------------------|----------------|------------------------------------|--------------------------------------------|
|                                | Low honesty<br>( <i>n</i> = 17)        | High honesty<br>( <i>n</i> = 15) | Low honesty<br>( <i>n</i> = 17)         | High honesty<br>( <i>n</i> = 16) | Honesty        | Pre-rated facial<br>attractiveness | Honesty×Pre-rated<br>facial attractiveness |
| <b>Personality rating</b>      |                                        |                                  |                                         |                                  |                |                                    |                                            |
| Unintelligent–Intelligent      | 6.00 (2.26)                            | 7.37 (1.14)                      | 6.59 (1.42)                             | 7.69 (0.79)                      | .002           | .235                               | .725                                       |
| Dependent–Independent          | 3.29 (1.93)                            | 5.27 (2.15)                      | 4.24 (1.56)                             | 6.56 (1.46)                      | < .001         | .015                               | .691                                       |
| Dishonest–Honest               | 2.65 (2.09)                            | 8.13 (1.19)                      | 2.76 (2.08)                             | 8.06 (1.00)                      | < .001         | .956                               | .823                                       |
| Calm–Anxious                   | 3.59 (2.15)                            | 5.36 (2.34)                      | 4.29 (1.76)                             | 4.62 (2.42)                      | .059           | .981                               | .192                                       |
| Unambitious–Ambitious          | 4.76 (2.02)                            | 2.86 (1.35)                      | 4.12 (1.62)                             | 3.50 (1.79)                      | .005           | .996                               | .141                                       |
| Unsociable–Sociable            | 3.12 (1.69)                            | 6.13 (1.68)                      | 4.29 (1.83)                             | 5.31 (1.25)                      | < .001         | .663                               | .017                                       |
| Dislike–Like                   | 2.71 (1.99)                            | 7.67 (1.29)                      | 2.88 (2.09)                             | 7.19 (1.22)                      | < .001         | .723                               | .444                                       |
| <b>Physical rating</b>         |                                        |                                  |                                         |                                  |                |                                    |                                            |
| Unattractive–Attractive        | 3.88 (1.80)                            | 5.33 (1.80)                      | 5.47 (2.24)                             | 6.75 (1.44)                      | .004           | .002                               | .852                                       |
| Mature faced–Baby faced        | 4.00 (2.10)                            | 3.71 (1.77)                      | 3.21 (1.26)                             | 3.12 (1.02)                      | .650           | .090                               | .800                                       |
| Masculine–Feminine             | 4.50 (2.39)                            | 4.87 (2.00)                      | 5.53 (2.48)                             | 5.56 (2.42)                      | .734           | .146                               | .777                                       |
| Mean–Kind                      | 5.50 (1.97)                            | 7.13 (1.25)                      | 5.21 (1.78)                             | 7.00 (1.21)                      | < .001         | .593                               | .840                                       |
| Poor fitness–Good fitness      | 5.59 (2.45)                            | 5.53 (1.88)                      | 5.00 (2.06)                             | 6.06 (1.12)                      | .303           | .952                               | .254                                       |
| Poor health–Good health        | 7.00 (1.62)                            | 7.60 (1.45)                      | 6.82 (1.29)                             | 7.12 (1.02)                      | .189           | .341                               | .662                                       |
| Short–Tall                     | 6.15 (2.03)                            | 5.73 (1.79)                      | 6.88 (1.73)                             | 6.50 (1.79)                      | .387           | .106                               | .973                                       |
| Underweight–Overweight         | 4.85 (1.80)                            | 4.93 (1.67)                      | 4.00 (2.09)                             | 4.16 (1.23)                      | .785           | .063                               | .930                                       |
| Small eyes–Large eyes          | 5.31 (1.74)                            | 5.50 (1.09)                      | 7.24 (0.90)                             | 7.25 (1.00)                      | .743           | < .001                             | .779                                       |
| Close eyes–Spaced eyes         | 4.82 (1.98)                            | 4.73 (0.88)                      | 5.24 (1.56)                             | 5.50 (1.32)                      | .816           | .121                               | .637                                       |
| Almond eyes–Round eyes         | 4.53 (2.29)                            | 4.43 (1.22)                      | 6.35 (1.11)                             | 6.09 (1.77)                      | .672           | < .001                             | .852                                       |
| Small nose–Large nose          | 6.38 (1.54)                            | 6.07 (1.14)                      | 6.00 (1.54)                             | 5.25 (1.34)                      | .140           | .095                               | .538                                       |
| Coarse hair–Fine hair          | 4.00 (2.76)                            | 3.67 (1.72)                      | 3.82 (1.67)                             | 4.56 (1.86)                      | .694           | .486                               | .300                                       |
| Thin lips–Full lips            | 6.47 (1.86)                            | 5.63 (1.23)                      | 4.82 (1.63)                             | 4.81 (1.56)                      | .292           | .003                               | .305                                       |
| Narrow chin–Wide chin          | 4.88 (2.22)                            | 5.67 (1.76)                      | 4.71 (1.65)                             | 5.19 (1.72)                      | .174           | .468                               | .739                                       |
| Rough skin–Smooth skin         | 5.93 (1.58)                            | 6.36 (0.93)                      | 6.65 (1.73)                             | 6.69 (1.35)                      | .531           | .162                               | .605                                       |
| Stout neck–Graceful neck       | 4.18 (2.19)                            | 4.20 (2.40)                      | 4.47 (1.87)                             | 4.44 (2.10)                      | .993           | .619                               | .958                                       |
| Angular face–Round face        | 4.06 (1.78)                            | 3.40 (1.72)                      | 4.24 (1.60)                             | 5.31 (0.87)                      | .587           | .008                               | .027                                       |
| Low cheekbones–High cheekbones | 4.59 (1.80)                            | 4.79 (1.76)                      | 5.18 (1.59)                             | 5.56 (1.46)                      | .486           | .106                               | .821                                       |
| Asymmetrical–Symmetrical       | 5.24 (2.28)                            | 5.47 (2.10)                      | 5.35 (2.12)                             | 5.06 (1.88)                      | .955           | .785                               | .619                                       |

*Note.* Standard deviations are presented in parentheses.
