# Supplementary material for: Good conduct makes your face attractive: The effect of personality perception on facial attractiveness judgments
Source: PubMed Central journal article supplement (PMC9925008; doi:10.1371/journal.pone.0281758), 2023-02-13
Supplement: pone.0281758.s003.pdf [file pone.0281758.s003.pdf]

S2 Table. Results of Experiment 2.

| Rating item               | Low shirt attractiveness         |                                   | High shirt attractiveness        |                                   | ANOVA <i>p</i> |                         |                                 |
|---------------------------|----------------------------------|-----------------------------------|----------------------------------|-----------------------------------|----------------|-------------------------|---------------------------------|
|                           | Low honesty<br>( <i>n</i> = 110) | High honesty<br>( <i>n</i> = 105) | Low honesty<br>( <i>n</i> = 133) | High honesty<br>( <i>n</i> = 109) | Honesty        | Shirt<br>attractiveness | Honesty×Shirt<br>attractiveness |
| Personality rating        |                                  |                                   |                                  |                                   |                |                         |                                 |
| Unintelligent–Intelligent | 58.1 (22.6)                      | 80.8 (14.5)                       | 57.6 (24.0)                      | 82.0 (13.9)                       | < .001         | .853                    | .832                            |
| Dependent–Independent     | 39.7 (23.3)                      | 57.1 (21.2)                       | 37.2 (21.9)                      | 61.8 (16.5)                       | < .001         | .441                    | .075                            |
| Dishonest–Honest          | 18.4 (22.2)                      | 89.9 (13.2)                       | 19.7 (22.7)                      | 89.1 (13.1)                       | < .001         | .906                    | .439                            |
| Calm–Anxious              | 45.7 (20.2)                      | 22.7 (15.0)                       | 45.2 (19.5)                      | 22.2 (14.8)                       | < .001         | .952                    | .668                            |
| Unambitious–Ambitious     | 48.4 (21.8)                      | 34.9 (18.9)                       | 49.0 (23.7)                      | 35.3 (17.6)                       | < .001         | .621                    | .931                            |
| Unsociable–Sociable       | 40.7 (17.6)                      | 61.4 (14.7)                       | 41.4 (19.2)                      | 60.8 (13.6)                       | < .001         | .912                    | .604                            |
| Dislike–Like              | 20.0 (21.6)                      | 84.2 (13.6)                       | 21.3 (22.2)                      | 83.8 (16.1)                       | < .001         | .911                    | .425                            |
| Physical rating           |                                  |                                   |                                  |                                   |                |                         |                                 |
| Unattractive–Attractive   | 40.1 (21.0)                      | 61.0 (21.8)                       | 43.5 (25.0)                      | 62.1 (20.5)                       | < .001         | .285                    | .631                            |
| Masculine–Feminine        | 37.9 (23.7)                      | 46.0 (28.1)                       | 40.1 (26.7)                      | 46.8 (29.3)                       | < .001         | .695                    | .333                            |
| Mean–Kind                 | 42.6 (21.8)                      | 65.2 (22.0)                       | 42.4 (21.9)                      | 64.0 (21.3)                       | < .001         | .625                    | .866                            |
| Poor health–Good health   | 54.6 (23.2)                      | 69.7 (23.4)                       | 65.3 (21.0)                      | 72.1 (20.8)                       | < .001         | .003                    | .072                            |
| Small eyes–Large eyes     | 64.4 (17.1)                      | 67.0 (19.8)                       | 64.2 (19.0)                      | 67.5 (19.3)                       | .201           | .826                    | .999                            |
| Coarse hair–Fine hair     | 57.5 (22.0)                      | 55.5 (23.0)                       | 57.3 (24.5)                      | 54.0 (22.5)                       | .246           | .962                    | .697                            |
| Stout neck–Graceful neck  | 35.5 (22.5)                      | 33.8 (22.2)                       | 37.0 (23.9)                      | 37.8 (23.5)                       | .712           | .167                    | .451                            |
| Angular face–Round face   | 44.6 (24.5)                      | 49.7 (25.3)                       | 46.4 (26.7)                      | 48.2 (26.2)                       | .255           | .653                    | .176                            |

*Note.* Standard deviations are presented in parentheses. Four-factorial ANOVA (honesty, shirt attractiveness, target gender, participant gender) was applied to each item.
