# Supplementary material for: Good conduct makes your face attractive: The effect of personality perception on facial attractiveness judgments
Source: PubMed Central journal article supplement (PMC9925008; doi:10.1371/journal.pone.0281758), 2023-02-13
Supplement: pone.0281758.s004.pdf [file pone.0281758.s004.pdf]

S3 Table. Results of Experiment 3.

| Rating item               | Low creativity                         |                                         | High creativity                        |                                         | ANOVA <i>p</i> |            |                               |
|---------------------------|----------------------------------------|-----------------------------------------|----------------------------------------|-----------------------------------------|----------------|------------|-------------------------------|
|                           | Low aggressiveness<br>( <i>n</i> = 31) | High aggressiveness<br>( <i>n</i> = 30) | Low aggressiveness<br>( <i>n</i> = 28) | High aggressiveness<br>( <i>n</i> = 28) | Aggressiveness | Creativity | Aggressiveness<br>×Creativity |
| <b>Personality rating</b> |                                        |                                         |                                        |                                         |                |            |                               |
| Unintelligent–Intelligent | 5.94 (1.50)                            | 4.20 (1.58)                             | 7.71 (1.44)                            | 6.07 (1.46)                             | < .001         | < .001     | .868                          |
| Dependent–Independent     | 7.13 (1.34)                            | 5.67 (1.83)                             | 7.96 (1.20)                            | 6.43 (1.79)                             | < .001         | .007       | .899                          |
| Dishonest–Honest          | 7.74 (1.29)                            | 4.13 (1.63)                             | 8.18 (0.98)                            | 4.75 (1.71)                             | < .001         | .050       | .735                          |
| Calm–Anxious              | 2.06 (0.96)                            | 6.87 (1.53)                             | 2.36 (1.50)                            | 6.96 (1.23)                             | < .001         | .426       | .691                          |
| Unaggressive–Aggressive   | 2.06 (0.89)                            | 7.20 (1.58)                             | 1.89 (0.96)                            | 7.57 (1.03)                             | < .001         | .641       | .206                          |
| Unambitious–Ambitious     | 3.42 (1.95)                            | 3.77 (1.77)                             | 5.04 (1.99)                            | 7.04 (1.37)                             | < .001         | < .001     | .014                          |
| Unsociable–Sociable       | 6.42 (1.80)                            | 4.73 (1.95)                             | 7.46 (1.73)                            | 6.57 (1.73)                             | < .001         | < .001     | .238                          |
| Uncreative–Creative       | 2.71 (1.04)                            | 2.40 (1.16)                             | 7.68 (1.31)                            | 7.96 (1.10)                             | .955           | < .001     | .166                          |
| Dislike–Like              | 6.77 (1.45)                            | 4.27 (1.55)                             | 7.32 (1.91)                            | 4.93 (2.19)                             | < .001         | .070       | .863                          |
| <b>Physical rating</b>    |                                        |                                         |                                        |                                         |                |            |                               |
| Unattractive–Attractive   | 5.32 (1.62)                            | 4.30 (1.73)                             | 5.04 (1.82)                            | 4.86 (1.84)                             | .066           | .677       | .195                          |
| Mature faced–Baby faced   | 4.26 (2.03)                            | 4.00 (1.88)                             | 3.32 (1.76)                            | 3.79 (1.75)                             | .766           | .098       | .298                          |
| Masculine–Feminine        | 4.81 (2.65)                            | 3.93 (1.82)                             | 4.29 (2.43)                            | 3.86 (2.34)                             | .134           | .490       | .607                          |
| Mean–Kind                 | 5.90 (1.89)                            | 5.43 (2.01)                             | 6.04 (1.57)                            | 5.14 (1.76)                             | .046           | .815       | .532                          |
| Poor fitness–Good fitness | 5.52 (2.25)                            | 6.23 (1.91)                             | 5.93 (1.92)                            | 6.46 (1.88)                             | .093           | .387       | .807                          |
| Poor health–Good health   | 6.58 (1.41)                            | 6.17 (1.88)                             | 6.57 (1.79)                            | 6.46 (2.03)                             | .432           | .663       | .643                          |
| Short–Tall                | 5.87 (2.00)                            | 5.80 (2.27)                             | 6.07 (2.05)                            | 5.25 (2.35)                             | .269           | .664       | .352                          |
| Underweight–Overweight    | 5.71 (1.70)                            | 5.70 (1.70)                             | 5.43 (2.04)                            | 5.43 (1.83)                             | .989           | .414       | .989                          |
| Small eyes–Large eyes     | 6.35 (1.89)                            | 6.47 (1.55)                             | 6.54 (1.64)                            | 6.25 (1.76)                             | .785           | .955       | .533                          |
| Coarse hair–Fine hair     | 4.26 (2.27)                            | 4.50 (2.13)                             | 4.29 (1.96)                            | 5.54 (2.17)                             | .062           | .182       | .205                          |
| Stout neck–Graceful neck  | 3.55 (1.63)                            | 3.17 (1.21)                             | 3.32 (1.68)                            | 2.82 (1.06)                             | .096           | .279       | .822                          |
| Angular face–Round face   | 5.35 (2.26)                            | 4.77 (1.83)                             | 4.96 (2.12)                            | 4.54 (2.19)                             | .194           | .427       | .838                          |

*Note.* Standard deviations are presented in parentheses.
