# Supplementary material for: Good conduct makes your face attractive: The effect of personality perception on facial attractiveness judgments
Source: PubMed Central journal article supplement (PMC9925008; doi:10.1371/journal.pone.0281758), 2023-02-13
Supplement: pone.0281758.s005.pdf [file pone.0281758.s005.pdf]

S4 Table. Results of Experiment 4.

| Rating item               | Relevant                        |                                  | Irrelevant                      |                                  | ANOVA <i>p</i> |           |                       |  |  |  |
|---------------------------|---------------------------------|----------------------------------|---------------------------------|----------------------------------|----------------|-----------|-----------------------|--|--|--|
|                           | Low honesty<br>( <i>n</i> = 33) | High honesty<br>( <i>n</i> = 33) | Low honesty<br>( <i>n</i> = 32) | High honesty<br>( <i>n</i> = 32) | Honesty        | Relevance | Honesty<br>×Relevance |  |  |  |
| Personality rating        |                                 |                                  |                                 |                                  |                |           |                       |  |  |  |
| Unintelligent–Intelligent | 6.61 (1.97)                     | 7.52 (1.15)                      | 5.31 (2.13)                     | 7.59 (1.01)                      | < .001         | .037      | .019                  |  |  |  |
| Dependent–Independent     | 3.52 (1.56)                     | 5.21 (1.96)                      | 3.41 (1.41)                     | 5.88 (1.83)                      | < .001         | .357      | .200                  |  |  |  |
| Dishonest–Honest          | 2.03 (1.19)                     | 7.73 (1.59)                      | 2.28 (1.35)                     | 8.12 (1.13)                      | < .001         | .166      | .753                  |  |  |  |
| Calm–Anxious              | 4.70 (2.04)                     | 2.55 (1.23)                      | 4.06 (2.02)                     | 2.88 (1.10)                      | < .001         | .600      | .099                  |  |  |  |
| Unambitious–Ambitious     | 4.39 (2.18)                     | 3.09 (1.38)                      | 5.56 (1.83)                     | 2.84 (1.14)                      | < .001         | .121      | .018                  |  |  |  |
| Unsociable–Sociable       | 3.61 (1.39)                     | 5.91 (1.49)                      | 4.28 (1.57)                     | 5.88 (1.31)                      | < .001         | .208      | .164                  |  |  |  |
| Dislike–Like              | 2.24 (1.25)                     | 7.42 (1.68)                      | 2.72 (1.46)                     | 7.22 (0.97)                      | < .001         | .574      | .158                  |  |  |  |
| Physical rating           |                                 |                                  |                                 |                                  |                |           |                       |  |  |  |
| Unattractive–Attractive   | 4.58 (1.70)                     | 4.97 (1.76)                      | 4.84 (1.95)                     | 5.03 (1.56)                      | .344           | .592      | .737                  |  |  |  |
| Masculine–Feminine        | 4.39 (2.34)                     | 4.24 (2.36)                      | 4.31 (2.46)                     | 4.22 (2.37)                      | .770           | .900      | .945                  |  |  |  |
| Mean–Kind                 | 4.39 (1.77)                     | 5.79 (1.63)                      | 5.34 (1.45)                     | 5.53 (1.78)                      | .008           | .237      | .041                  |  |  |  |
| Poor health–Good health   | 6.03 (1.86)                     | 6.33 (1.65)                      | 6.59 (1.54)                     | 6.12 (1.74)                      | .782           | .553      | .199                  |  |  |  |
| Small eyes–Large eyes     | 6.09 (1.47)                     | 6.24 (1.50)                      | 6.34 (1.68)                     | 6.03 (1.47)                      | .765           | .938      | .389                  |  |  |  |
| Coarse hair–Fine hair     | 4.15 (2.22)                     | 5.67 (1.85)                      | 4.44 (2.00)                     | 4.59 (1.86)                      | .018           | .262      | .054                  |  |  |  |
| Stout neck–Graceful neck  | 4.30 (1.78)                     | 3.24 (1.54)                      | 3.38 (1.60)                     | 3.53 (1.41)                      | .108           | .254      | .031                  |  |  |  |
| Angular face–Round face   | 4.67 (1.65)                     | 4.33 (1.67)                      | 3.88 (2.01)                     | 4.38 (1.96)                      | .796           | .245      | .197                  |  |  |  |
| Mood rating               |                                 |                                  |                                 |                                  |                |           |                       |  |  |  |
| PA                        | 2.89 (1.28)                     | 3.14 (1.43)                      | 2.87 (1.38)                     | 2.90 (1.44)                      | .553           | .586      | .642                  |  |  |  |
| NA                        | 1.88 (1.23)                     | 1.49 (1.15)                      | 2.04 (1.50)                     | 1.76 (1.13)                      | .128           | .345      | .799                  |  |  |  |

*Note.* Standard deviations are presented in parentheses. PA = positive affect, NA = negative affect.
